# Supplementary material for: Production of Cyanotoxins by Microcystis aeruginosa Mediates Interactions with the Mixotrophic Flagellate Cryptomonas
Source: MDPI journal article supplement (doi:10.3390/toxins11040223), 2019-04-15
Supplement: s1 [file s1]

## Supplementary Materials: Production of Cyanotoxins by *Microcystis aeruginosa* Mediates Interactions with The Mixotrophic Flagellate *Cryptomonas*

Sarah DeVaul Princiotta, Susan P. Hendricks and David S. White

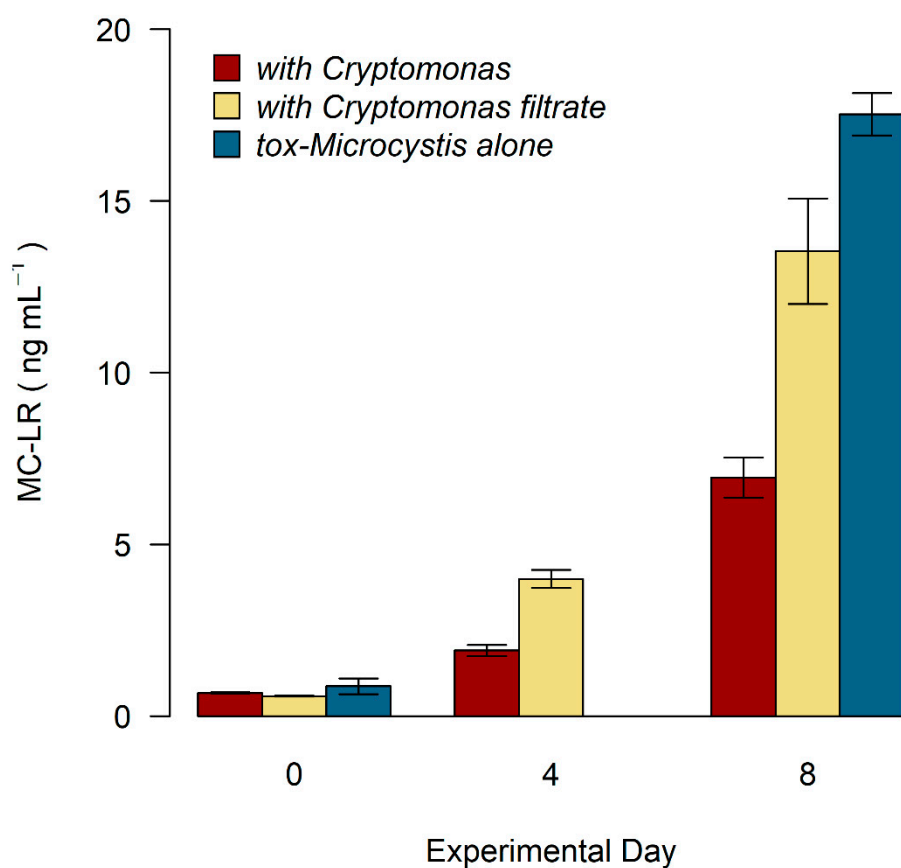

**Figure S1.** Concentration of microcystin-LR (MC-LR) without correction for cell abundance, as measured in tox-*Microcystis* after incubation with *Cryptomonas*, filtrate from the mixotroph, or alone in monoculture. Note that MC-LR was not measured in tox-*Microcystis* monoculture on day 4.

**Table S1.** Average dissolved organic carbon (DOC) derived from unialgal cultures, measured in triplicate samples.

| Species                 | DOC<br>(mg L <sup>-1</sup> ) | Std.<br>Error |
|-------------------------|------------------------------|---------------|
| <i>Cryptomonas</i> sp.  | 19.72                        | 0.87          |
| tox- <i>Microcystis</i> | 5.38                         | 0.47          |
| nt- <i>Microcystis</i>  | 6.27                         | 0.17          |
